# Supplementary material for: The combination of epigenetic drugs SAHA and HCI-2509 synergistically inhibits EWS-FLI1 and tumor growth in Ewing sarcoma
Source: PubMed Central journal article supplement (PMC6101143; doi:10.18632/oncotarget.25829), 2018-07-31
Supplement: oncotarget-09-31397-s001.pdf [file oncotarget-09-31397-s001.pdf]

## The combination of epigenetic drugs SAHA and HCI-2509 synergistically inhibits EWS-FLI1 and tumor growth in Ewing sarcoma

### SUPPLEMENTARY MATERIALS

**Supplementary Table 1: Taqman probes used for qRT-PCR**

| Genes          | Brand         | Reference     | Amplicon length |
|----------------|---------------|---------------|-----------------|
| CCND1          | Thermo Fisher | Hs00765553_m1 | 57 bp           |
| DKK1           | Thermo Fisher | Hs00183740_m1 | 68 bp           |
| EWSR1          | Thermo Fisher | Hs01580530_gH | 89 bp           |
| EWS-FLI1       | Thermo Fisher | Hs03024497_ft | 80 bp           |
| EZH2           | Thermo Fisher | Hs00544830_m1 | 86 bp           |
| TGF $\beta$ R2 | Thermo Fisher | Hs00234253_m1 | 70 bp           |
| TPT1           | Thermo Fisher | Hs02621289_g1 | 131 bp          |

**Supplementary Table 2: The clinical characteristics of the ES patients**

| Model code  | Age at dx | Age at biopsy | Source of biopsy <sup>1</sup> | Primary tumor      | Why biopsy | Fusion gene                | STAG2 mutation | Patient status <sup>2</sup> |
|-------------|-----------|---------------|-------------------------------|--------------------|------------|----------------------------|----------------|-----------------------------|
| HSJD-ES-001 | 17 y      | 21.7          | Scapula                       | Scapula            | Relapse    | EWS-FLI1 type 2            | mutated        | DOD                         |
| HSJD-ES-004 | 10 y      | 18.0          | Mediastinum                   | Vertebral body T12 | Relapse    | EWS-FLI1 type 1            | Wild type      | NED                         |
| HSJD-ES-006 | 13 y      | 13.7          | Lung nodule                   | Fibula             | Relapse    | EWS-FLI1 type 1 ex 10-ex 5 | Wild type      | DOD                         |
| HSJD-ES-011 | 10 y      | 13.9          | Pleura                        | n.a.               | Relapse    | EWS-FLI1 type 1            | Not done       | AWD                         |

<sup>1</sup>Tumor tissues were collected with informed consent under an Institutional Review Board-approved protocol.

<sup>2</sup>DOD died of disease, NED no evidence of disease, AWD alive with disease.

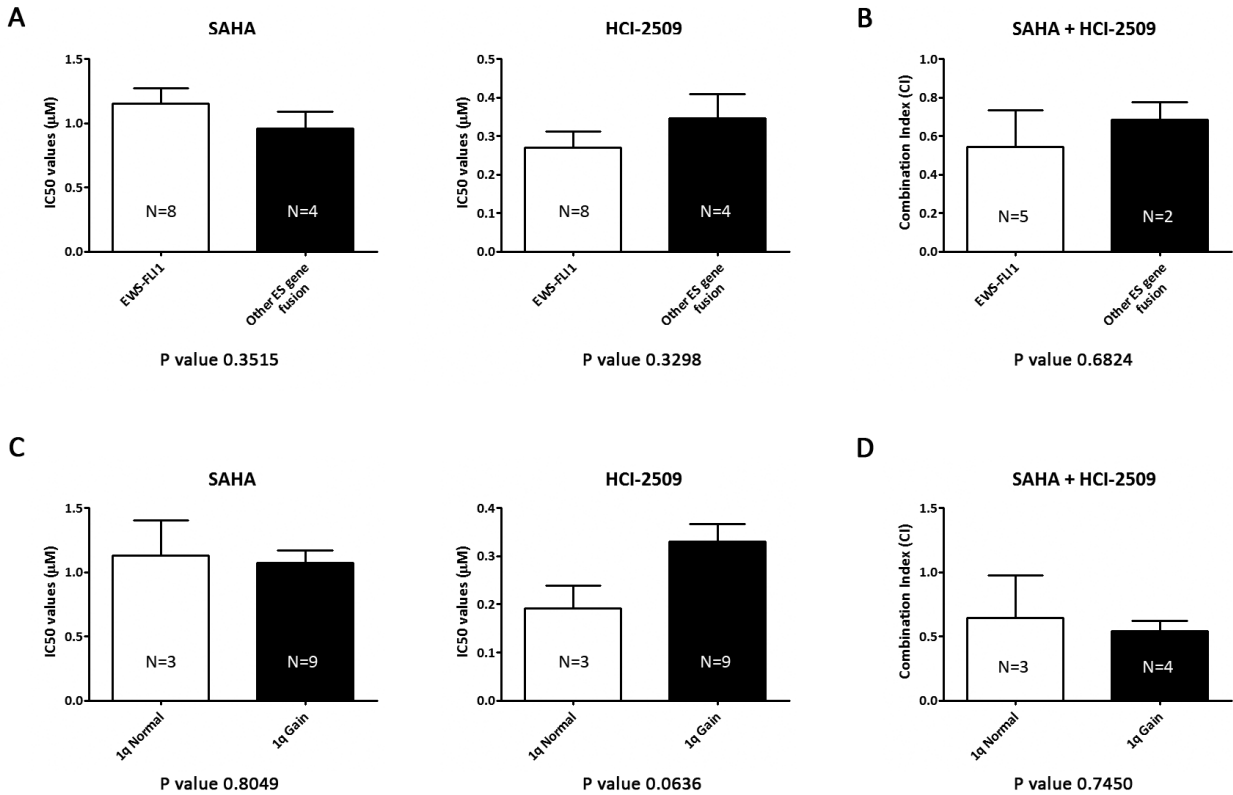

**E**

HCl-2509 and SAHA inhibitory concentrations

| HCl-2509 (iLSD1) |                        |       |                        |       |                        |           |                        |       |
|------------------|------------------------|-------|------------------------|-------|------------------------|-----------|------------------------|-------|
| Cell Line        | IC25 ( $\mu\text{M}$ ) | s.d.  | IC50 ( $\mu\text{M}$ ) | s.d.  | IC75 ( $\mu\text{M}$ ) | s.d.      | IC90 ( $\mu\text{M}$ ) | s.d.  |
| A673             | 0.029                  | 0.022 | 0.097                  | 0.052 | 0.372                  | 0.036     | 1.951                  | 0.381 |
| CADO-ES          | 0.166                  | 0.027 | 0.282                  | 0.039 | 0.494                  | 0.042     | 0.877                  | 0.111 |
| TC32             | 0.117                  | 0.032 | 0.187                  | 0.019 | 0.479                  | 0.323     | 0.780                  | 0.193 |
| SAHA             |                        |       |                        |       |                        |           |                        |       |
| Cell Line        | IC25 ( $\mu\text{M}$ ) | s.d.  | IC50 ( $\mu\text{M}$ ) | s.d.  | IC75 ( $\mu\text{M}$ ) | Cell Line | IC90 ( $\mu\text{M}$ ) | s.d.  |
| A673             | 0.935                  | 0.002 | 1.676                  | 0.347 | 2.307                  | 0.115     | 3.779                  | 0.290 |
| CADO-ES          | 0.604                  | 0.118 | 1.089                  | 0.168 | 1.634                  | 0.286     | 2.755                  | 0.568 |
| TC32             | 0.902                  | 0.123 | 1.553                  | 0.160 | 2.495                  | 0.253     | 4.432                  | 0.505 |

Proliferation IC values of ES cell lines assayed for HCl-2509 or SAHA sensitivity and measured after 72h of drug exposition

**Supplementary Figure 1: Drug sensitivity is independent from ES fusion type or 1q status in ES cell lines.** (A) Mean of SAHA and HCl-2509 IC50 values between *EWS-FL11* fusion type-ES cell lines group and others fusion types-ES cell line group (*EWS-ERG* and *EWS-FEV*) are shown. (B) SAHA+HCl-2509 combination index (CI) of *EWS-FL11* fusion type-ES cell lines group and others fusion types-ES cell lines group is shown. (C) Drug sensitivity (IC50 values) between 1q normal ES cell lines group and 1q gain ES cell line group. (D) SAHA+HCl-2509 combination index (CI) of 1q normal ES cell lines group and 1q gain ES cell lines group. Values shown are mean  $\pm$  s.d. of three independent replicates. (E) IC25, IC50, IC75 and IC90 values of ES cell lines assayed for HCl-2509 or SAHA after 72 h exposition to the drugs are shown.

**A**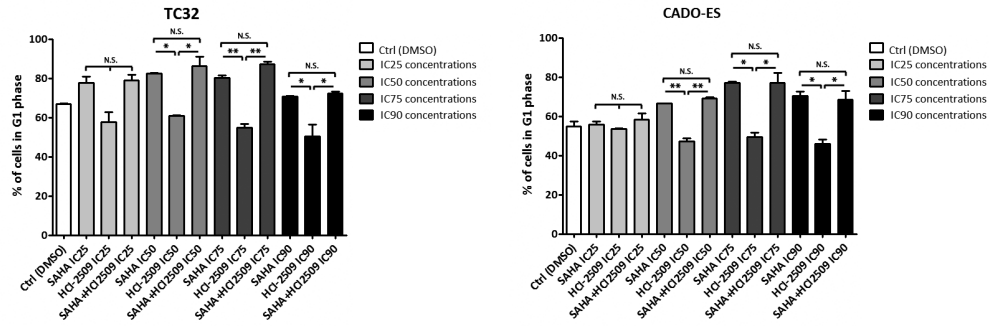**B**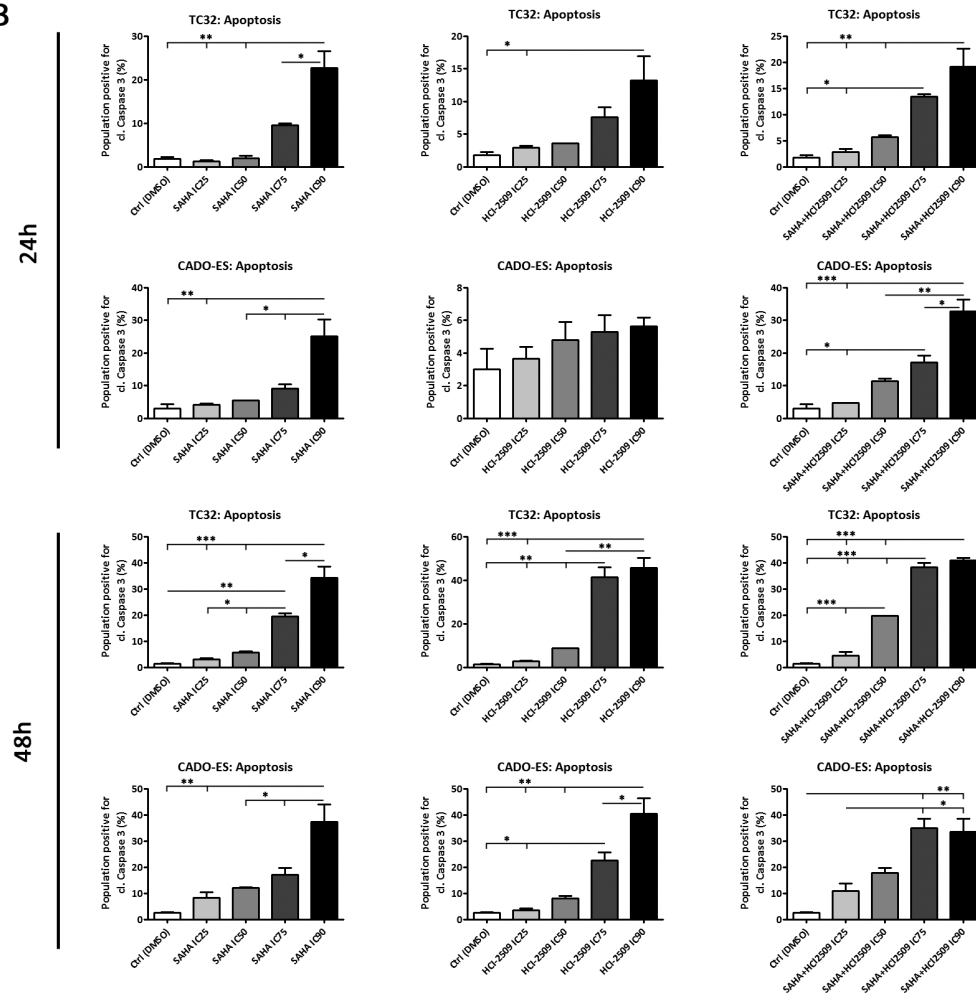

**Supplementary Figure 2: SAHA+HCI-2509 combination altered cell cycle progression and induced apoptosis.** (A) Quantification of cells in G1 phase of cell cycle after SAHA, HCI-2509 and combination treatment are shown in TC32 and CADO-ES cell lines. (B) Apoptosis induction detailed analysis of population positive for cleaved Caspase 3 in TC32 and CADO-ES cell lines after 24 h (upper panel) and 48 h (lower panel) of SAHA, HCI-2509, alone or in combination, at different concentrations. In all cases, mean  $\pm$  s.d. of three biological independent replicates. Statistical tests: significant analysis of variance, Tukey post-hoc test  $<0.001$  (\*\*\*),  $0.01$  (\*\*), and  $0.05$  (\*).

**A**

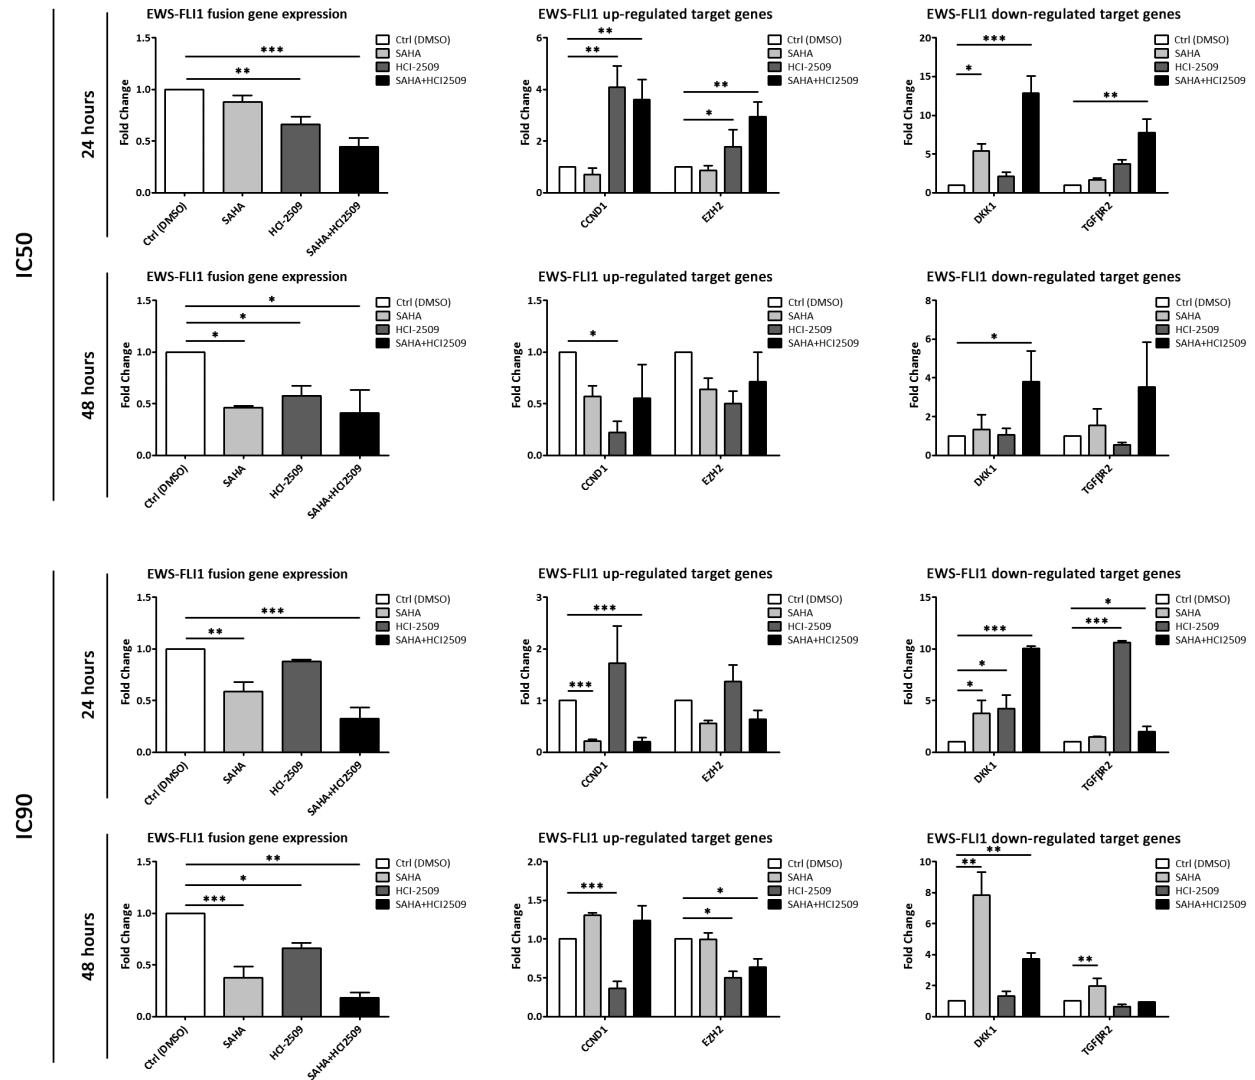

**B**

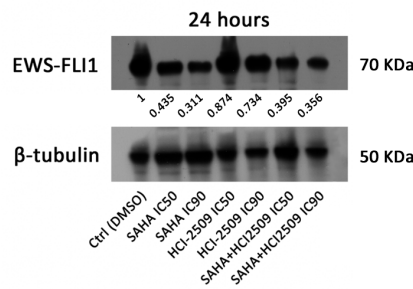

**C**

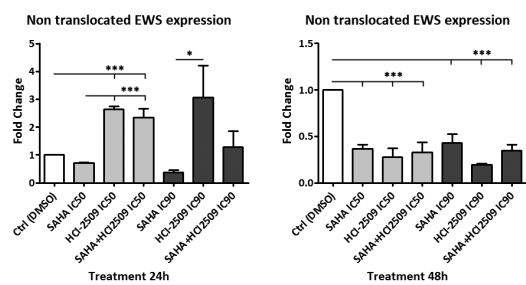

**Supplementary Figure 3: SAHA, HCI-2509, and SAHA+HCI-2509 treatment inhibited EWS-FLI1 expression in the A673 cell line.** (A) mRNA expression analysis by RT-qPCR of EWS-FLI1 (left column), and EWS-FLI1-induced/repressed target genes (middle/right column) after 24 h and 48 h of SAHA, HCI-2509 and combination treatment at IC50 (upper panel) and IC90 concentrations (lower panel) in A673 cell line. (B) Immunoblot of EWS-FLI1 protein expression after 24h of SAHA, HCI-2509 and combination treatment at IC50 and IC90 concentrations in A673 cell line is shown. Relative quantification is showed respect to the control (DMSO). (C) mRNA expression analysis by RT-qPCR of non-translocated EWSR1 after 24 h (left panel) and 48 h (right panel) of SAHA, HCI-2509 and combination treatment at IC50 and IC90 concentrations in TC32 cell line. Mean  $\pm$  s.d. of three biological independent replicates is shown. Statistical tests: significant analysis of variance, Tukey post-hoc test  $<0.001$  (\*\*\*),  $0.01$  (\*\*), and  $0.05$  (\*).

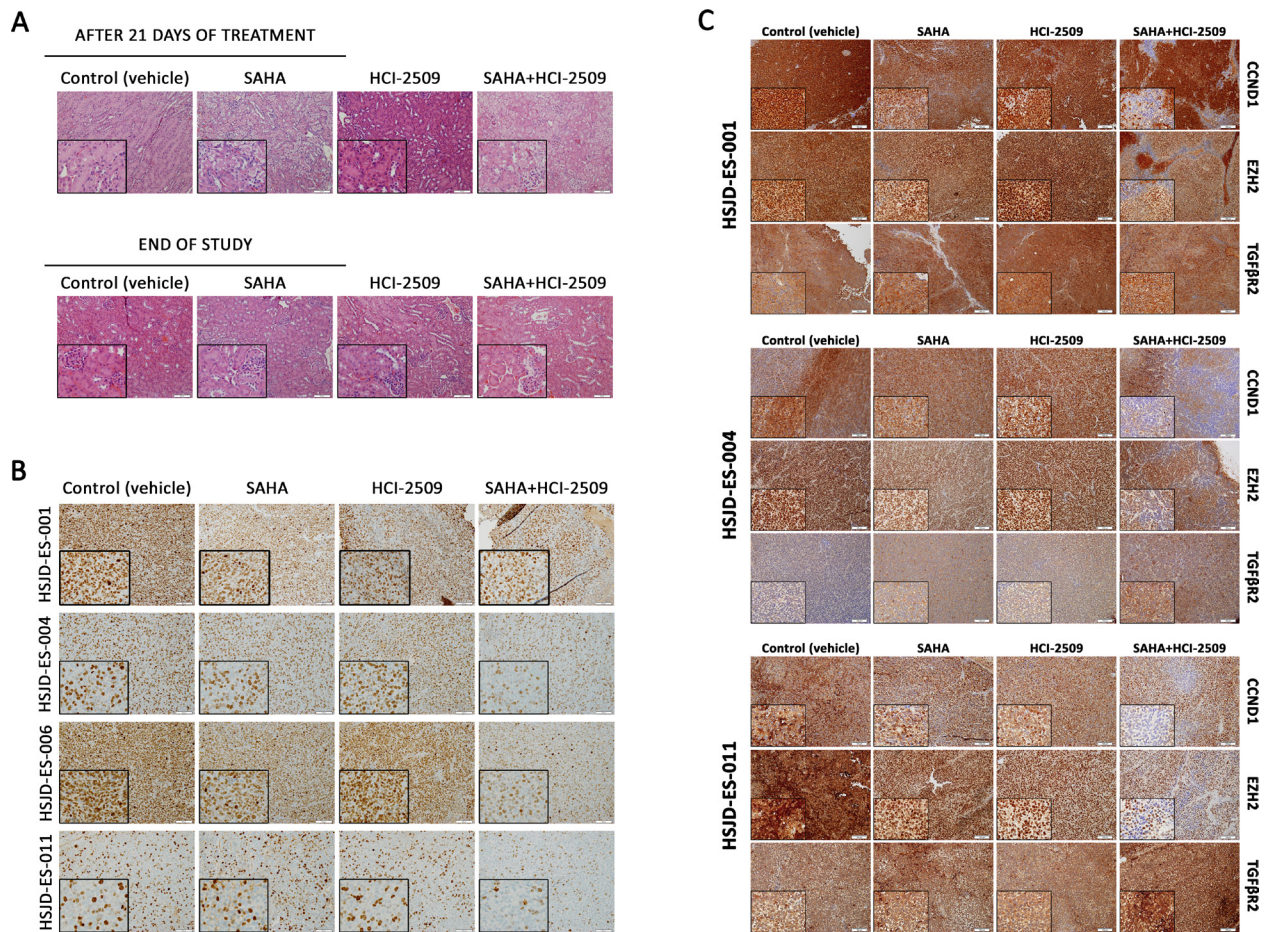

**Supplementary Figure 4: Histopathological study of PDX treated tumor samples.** (A) Morphological study of mice kidney tissue (hematoxylin and eosin staining) showed intracellular vacuolization induced by SAHA treatment in these samples. (B) Immunohistochemical staining of Ki67-positively labelled nuclei after 21 days of SAHA, HCI-2509, and combination treatment (20× and 40× magnifications). (C) Immunohistochemical staining of EWS-FLI1 targets CCND1, EZH2 and TGFβR2 in ES-PDX tumor samples treated in monotherapy or combination (20× and 40× magnifications).
